# Supplementary material
Source: publisher figshare collection journal article supplement (https://acs.figshare.com/ndownloader/files/10484791)
Supplement: Supplementary file 1 [file 10484791]

1    **Supporting information**

2

3    **Molecular characterization of water-soluble humic-like substances in smoke**  
4    **particles emitted from combustion of biomass materials and coal using**  
5    **ultrahigh-resolution electrospray ionization Fourier transform ion cyclotron**  
6    **resonance mass spectrometry**

7

8    Jianzhong Song<sup>a</sup>, Meiju Li<sup>a,c</sup>, Bin Jiang<sup>a</sup>, Siye Wei<sup>a,c</sup>, Xingjun Fan<sup>a,b</sup>, Ping'an Peng<sup>a</sup>

9

10    <sup>a</sup> State Key Laboratory of Organic Geochemistry, Guangzhou Institute of

11    Geochemistry, Chinese Academy of Sciences, Guangzhou 510640, P. R. China

12    <sup>b</sup> College of Resource and Environment, Anhui Science and Technology University,

13    Anhui 233100, P. R. China

14    <sup>c</sup> Graduate School of Chinese Academy of Sciences, Beijing 100049, P. R. China

15

16    \* Corresponding author e-mail: [songjzh@gig.ac.cn](mailto:songjzh@gig.ac.cn)

17

18    Samples, Data processing, 2 Tables, 6 Figures, 15 pages in total

19

20

21    **Contents:**

- 22    1. Samples.
- 23    2. Data processing.
- 24    3. Table S1. Percentage (%) of different compound category in total unique chemical  
25    formulae.
- 26    4. Table S2. Number of formulae in each compound category and the average values  
27    of elemental ratios, molecular weight, double-bond equivalents (DBEs) and  
28    aromaticity index ( $AI_{mod}$ ).
- 29    5. Figure S1. Reconstructed Fourier-transform ion cyclotron resonance (FT-ICR)  
30    mass spectra for the four smoke HULIS samples.
- 31    6. Figure S2. Venn diagrams showing the relative distributions of all molecular  
32    formulae (7291 total) present in the four smoke HULIS samples. Percentages in  
33    areas of overlap are percentages of molecular formulae that appear in both, three  
34    or all four of those samples. Percentages in areas with no overlap are unique to  
35    that individual sample.
- 36    7. Figure S3. Van Krevelen diagrams of the four smoke HULIS samples.
- 37    8. Figure S4. Classification of CHON compounds into different subgroups according  
38    to the number of N and O atoms in their molecules. The high of column is the sum  
39    of peak intensities in each subgroup.
- 40    9. Figure S5. O/N vs C number for all the CHON compounds of the four smoke  
41    HULIS samples. The color bar and marker size denote the DBE values and the  
42    peak intensities of the compounds.

43 10. Figure S6. Double bond equivalent (DBE) vs C number for all the CHOS  
44 compounds of the three BB-smoke HULIS samples. The color bar and marker size  
45 denote the number of O atoms and the peak intensities of the compounds. The  
46 formulae in the box a are  $C_{17}H_{27}O_3S_1$ ,  $C_{18}H_{29}O_3S_1$ , and  $C_{19}H_{31}O_3S_1$ , corresponding  
47 to alkane sulfonates that are known to exist widely in the atmospheric  
48 environment and the background pollution during FT-ICR MS measurement.

49

50

51

## 52    **1. Samples**

53        In this study, four types of smoke particle samples were collected from the  
54    combustion of three biomass materials (i.e., corn straw, rice straw, and pine branch)  
55    and a lignite coal. Rice straw and corn straw were collected at Liuzhou, Guangxi  
56    Zhuang Autonomous Region, China. The pine branch was obtained at Qingyuan,  
57    Guangdong province, China. The lignite coal was obtained at Pingdingshan, Henan  
58    province, China.

59        After collected, corn straw, rice straw, and pine branch were firstly washed with  
60    tap water three times to remove dust and then air-dried for 7 days. The coal sample  
61    was also air-dried for 7 days. Finally these four samples were stored in bags until used  
62    for combustion.

63

## 64    **2. Data processing**

65        The mass spectra were processed using custom software, which has been  
66    described elsewhere.<sup>1-3</sup> All the ions with relative abundance greater than 6 times the  
67    standard deviation of the baseline noise and in the  $m/z$  range from 150 to 800 were  
68    exported. Subsequently, all mathematically possible formulae for these ions were  
69    calculated using a mass tolerance of  $\pm 1$  ppm. The general formula  $C_cH_hO_oN_nS_s$  was  
70    used to indicate the assigned compounds, in which the C, H, O, N, S indicate carbon,  
71    hydrogen, oxygen, nitrogen and sulfur respectively and the c, h, o, n, s represent the  
72    number of atoms of carbon, hydrogen, oxygen, nitrogen and sulfur, respectively.

73        The calculated formulae were further characterized by the number of rings plus

74 double bonds (i.e., the double bond equivalents (DBE)) calculated from the elemental  
75 composition  $C_cH_hO_oN_nS_s$ :<sup>4, 5</sup>

76 
$$DBE = (2c + 2 - h + n) / 2$$

77 DBE reflects the degree of unsaturation (hydrogen deficiency) in a given compound.<sup>6</sup>

78 All the calculated formulae with  $DBE < 0$  and  $> 20$  and that disobey the nitrogen rules  
79 for the even electron ions were excluded from the lists.

80 Each molecular formula was also estimated using the modified aromaticity index  
81 ( $AI_{mod}$ ) based on the system proposed by Koch and Dittmar:<sup>7</sup>

82 
$$AI_{mod} = (1 + c - 0.5o - s - 0.5h) / (c - 0.5o - s - n)$$

83 Here, formulae are conservatively classified as non aromatic ( $AI < 0.5$ ), aromatic ( $AI >$   
84  $0.5$ ) and condensed aromatic ( $AI \geq 0.67$ ). Because of heteroatoms such as oxygen,  
85 sulfur and nitrogen were taken into account as potential contributors, this ratio is a  
86 suitable parameter for the identification of aromatic structures in natural organic  
87 matter.

88 It is noted that each molecule should present with different intensity, the overall  
89 properties of the four HULIS were done with relative abundance weighted. The  
90 relative abundance weighted elemental ratios, organic mass to organic carbon ratios,  
91 DBE, and  $AI_{mod}$  were calculated from the intensity (Int) of each assigned peak (i)  
92 using the following equations:<sup>5, 8</sup>

93 
$$MW_w = \Sigma(MW_i * Int_i) / \Sigma Int_i$$

94 
$$O/C_w = \Sigma(O/C_i * Int_i) / \Sigma Int_i$$

95 
$$H/C_w = \Sigma(H/C_i * Int_i) / \Sigma Int_i$$

$$S/C_w = \Sigma(S/C_i * Int_i) / \Sigma Int_i$$

$$O/N_w = \Sigma(O/N_i * Int_i) / \Sigma Int_i$$

$$O/S_w = \Sigma(O/S_i * Int_i) / \Sigma Int_i$$

$$OM/OC_w = \Sigma(OM/OC_i * Int_i) / \Sigma Int_i$$

$$DBE_w = \Sigma(DBE_i * Int_i) / \Sigma Int_i$$

$$AI_{mod,w} = \Sigma(AI_{mod,i} * Int_i) / \Sigma Int_i$$

for elemental compositions of  $C_cH_hN_nO_oS_s$ , where  $Int_i$  is the intensity for each individual molecular formula,  $i$

## Reference

- (1) Shi, Q.; Pan, N.; Long, H. Y.; Cui, D. C.; Guo, X. F.; Long, Y. H.; Chung, K. H.; Zhao, S. Q.; Xu, C. M.; Hsu, C. S., Characterization of Middle-Temperature Gasification Coal Tar. Part 3: Molecular Composition of Acidic Compounds. *Energy Fuel* 2013, 27, (1), 108-117.
- (2) Jiang, B.; Liang, Y. M.; Xu, C. M.; Zhang, J. Y.; Hu, M.; Shi, Q., Polycyclic Aromatic Hydrocarbons (PAHs) in Ambient Aerosols from Beijing: Characterization of Low Volatile PAHs by Positive-Ion Atmospheric Pressure Photoionization (APPI) Coupled with Fourier Transform Ion Cyclotron Resonance. *Environ Sci Technol* 2014, 48, (9), 4716-4723.
- (3) Li, Y. Y.; Fang, Z.; He, C.; Zhang, Y. H.; Xu, C. M.; Chung, K. H.; Shi, Q., Molecular Characterization and Transformation of Dissolved Organic Matter in Refinery Wastewater from Water Treatment Processes: Characterization by Fourier

118 Transform Ion Cyclotron Resonance Mass Spectrometry. *Energ Fuel* 2015, 29, (11),  
 119 6956-6963.

120 (4) Lin, P.; Rincon, A. G.; Kalberer, M.; Yu, J. Z., Elemental Composition of HULIS  
 121 in the Pearl River Delta Region, China: Results Inferred from Positive and Negative  
 122 Electrospray High Resolution Mass Spectrometric Data. *Environ Sci Technol* 2012,  
 123 46, (14), 7454-7462.

124 (5) Zhao, Y.; Hallar, A. G.; Mazzoleni, L. R., Atmospheric organic matter in clouds:  
 125 exact masses and molecular formula identification using ultrahigh-resolution FT-ICR  
 126 mass spectrometry. *Atmos Chem Phys* 2013, 13, (24), 12343-12362.

127 (6) Hockaday, W. C.; Grannas, A. M.; Kim, S.; Hatcher, P. G., Direct molecular  
 128 evidence for the degradation and mobility of black carbon in soils from  
 129 ultrahigh-resolution mass spectral analysis of dissolved organic matter from a  
 130 fire-impacted forest soil. *Org Geochem* 2006, 37, (4), 501-510.

131 (7) Koch, B. P.; Dittmar, T., From mass to structure: an aromaticity index for  
 132 high-resolution mass data of natural organic matter. *Rapid Commun Mass Sp* 2006, 20,  
 133 (5), 926-932.

134 (8) Sleighter, R. L.; Hatcher, P. G., Molecular characterization of dissolved organic  
 135 matter (DOM) along a river to ocean transect of the lower Chesapeake Bay by  
 136 ultrahigh resolution electrospray ionization Fourier transform ion cyclotron resonance  
 137 mass spectrometry. *Mar Chem* 2008, 110, (3-4), 140-152.

138

139

140 **Table S1.** Percentage (%) of different compound category in total unique chemical formulae.

| Formulae subgroups | Corn | Rice | Pine | Coal |
|--------------------|------|------|------|------|
|                    |      |      |      |      |
| CHO                | 57.8 | 14.6 | 56.1 | 6.6  |
| CHON               | 30.2 | 81.2 | 30.7 | 15.3 |
| CHOS               | 9.0  | 1.5  | 8.4  | 43.3 |
| CHONS              | 3.0  | 2.7  | 4.8  | 34.8 |



**Table S2.** Number of formulae in each compound category and the average values of elemental ratios, molecular weight, double-bond equivalents (DBEs) and aromaticity index ( $AI_{mod}$ ).

| Samples | Elemental compositions | Number of formulas | $MW_w$ | $H/C_w$ | $O/C_w$ | $N/C_w$ | $S/C_w$ | $O/N_w$ | $O/S_w$ | $OM/OC_w$ | $DBE_w$ | $DBE/C_w$ | $AI_{mod,w}$ |
|---------|------------------------|--------------------|--------|---------|---------|---------|---------|---------|---------|-----------|---------|-----------|--------------|
| Corn    | CHO                    | 1514               | 296    | 1.33    | 0.41    | -       | -       | -       | -       | 1.66      | 6.23    | 0.41      | 0.31         |
|         | CHON                   | 1640               | 335    | 1.13    | 0.43    | 0.085   | -       | 5.83    | -       | 1.76      | 8.59    | 0.55      | 0.44         |
|         | CHOS                   | 227                | 328    | 1.48    | 0.41    | -       | 0.072   | -       | 5.57    | 1.86      | 4.83    | 0.33      | 0.13         |
|         | CHONS                  | 146                | 311    | 1.21    | 0.57    | 0.087   | 0.087   | 6.67    | 6.67    | 2.19      | 6.17    | 0.53      | 0.27         |
| Rice    | CHO                    | 1733               | 311    | 1.13    | 0.40    | -       | -       | -       | -       | 1.62      | 7.58    | 0.47      | 0.38         |
|         | CHON                   | 2405               | 343    | 1.10    | 0.45    | 0.093   | -       | 5.66    | -       | 1.79      | 9.00    | 0.57      | 0.46         |
|         | CHOS                   | 339                | 300    | 1.28    | 0.46    | -       | 0.081   | -       | 5.65    | 1.94      | 5.07    | 0.40      | 0.18         |
|         | CHONS                  | 248                | 330    | 1.21    | 0.55    | 0.081   | 0.081   | 6.91    | 6.91    | 2.15      | 6.17    | 0.48      | 0.22         |
| Pine    | CHO                    | 2296               | 337    | 1.30    | 0.21    | -       | -       | -       | -       | 1.39      | 8.02    | 0.40      | 0.35         |
|         | CHON                   | 1527               | 365    | 1.07    | 0.42    | 0.082   | -       | 5.99    | -       | 1.74      | 9.68    | 0.57      | 0.45         |
|         | CHOS                   | 522                | 342    | 1.41    | 0.41    | -       | 0.068   | -       | 6.03    | 1.84      | 5.62    | 0.36      | 0.18         |
|         | CHONS                  | 276                | 328    | 1.24    | 0.61    | 0.086   | 0.086   | 7.19    | 7.19    | 2.24      | 6.21    | 0.51      | 0.23         |
| Coal    | CHO                    | 918                | 270    | 1.13    | 0.31    | -       | -       | -       | -       | 1.51      | 7.48    | 0.51      | 0.45         |
|         | CHON                   | 610                | 295    | 1.01    | 0.27    | 0.070   | -       | 4.15    | -       | 1.52      | 9.57    | 0.60      | 0.56         |
|         | CHOS                   | 669                | 277    | 1.26    | 0.42    | -       | 0.085   | -       | 5.02    | 1.89      | 5.80    | 0.46      | 0.31         |
|         | CHONS                  | 430                | 304    | 1.09    | 0.44    | 0.082   | 0.082   | 5.31    | 5.31    | 1.98      | 7.52    | 0.58      | 0.45         |

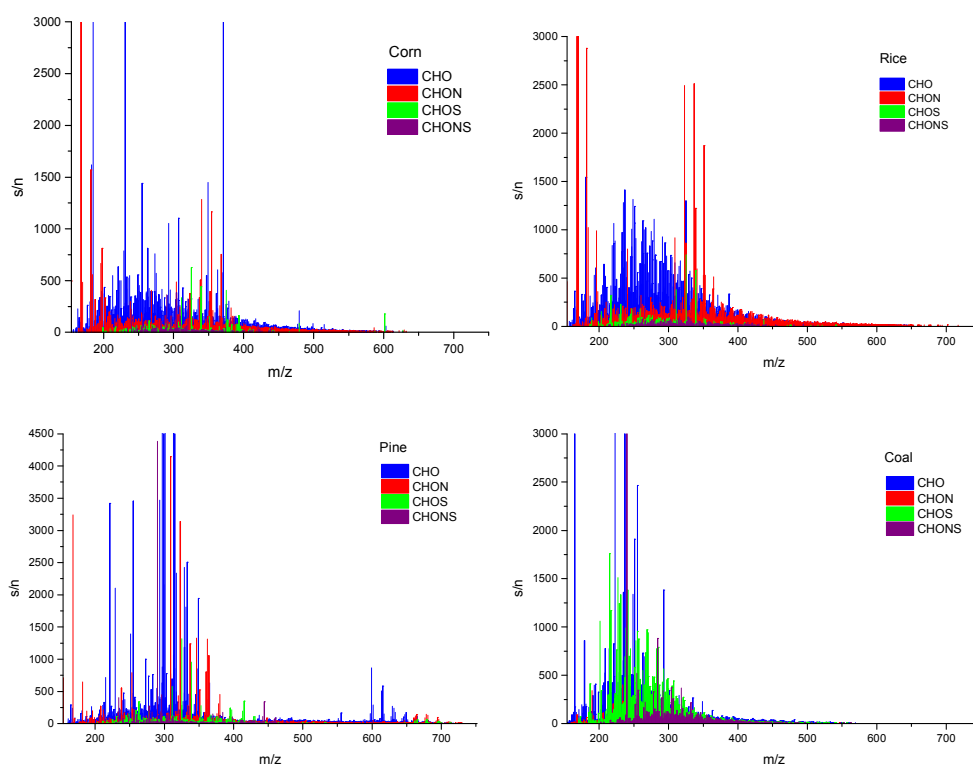

**Figure S1.** Reconstructed Fourier-transform ion cyclotron resonance (FT-ICR) mass spectra for the four smoke HULIS samples.

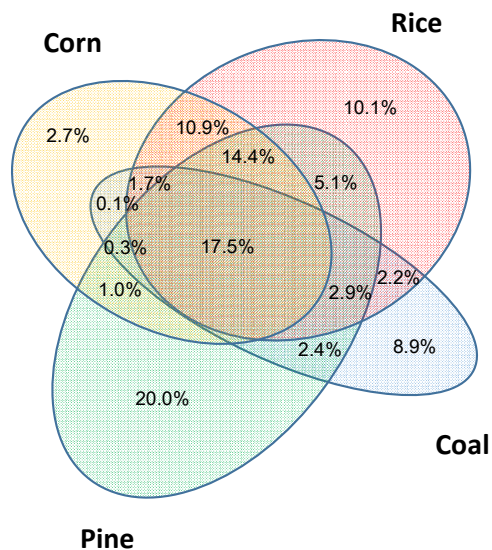

**Figure S2.** Venn diagrams showing the relative distributions of all molecular formulae (7291 total) present in the four smoke HULIS samples. Percentages in areas of overlap are percentages of molecular formulae that appear in both, three or all four of those samples. Percentages in areas with no overlap are unique to that individual sample.

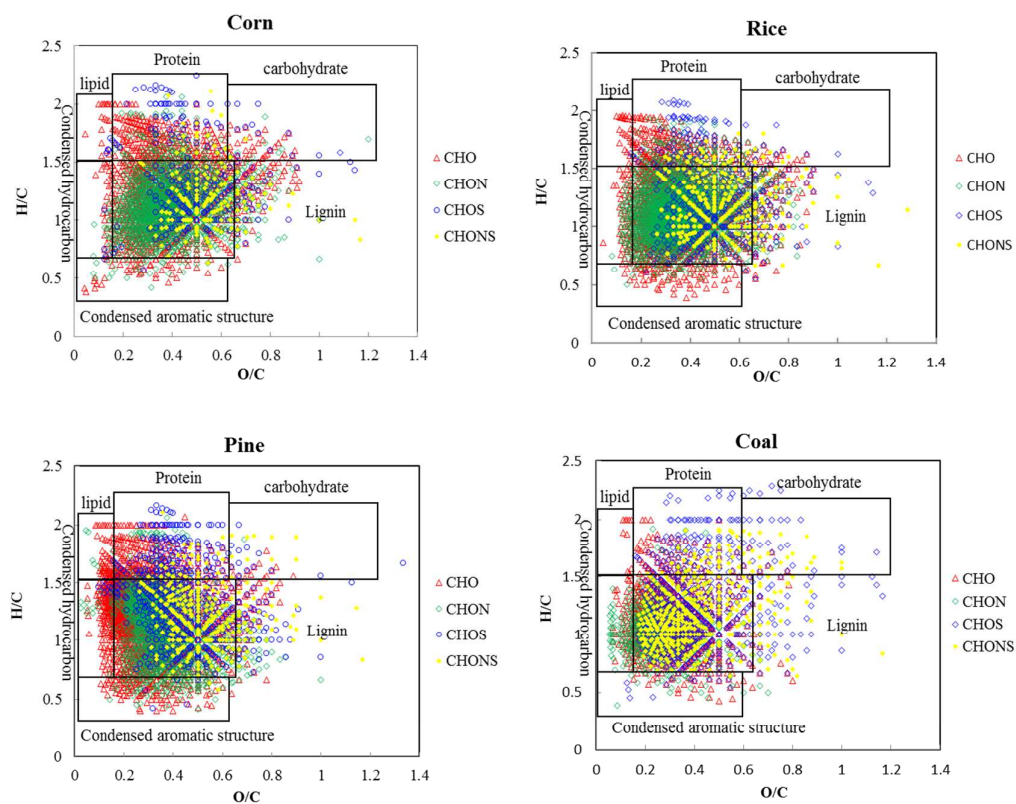

**Figure S3.** Van Krevelen diagrams of the four smoke HULIS samples. The composition domains in coal-smoke HULIS are the molecular formulae similar to lipids, proteins, lignins, and carbohydrates.

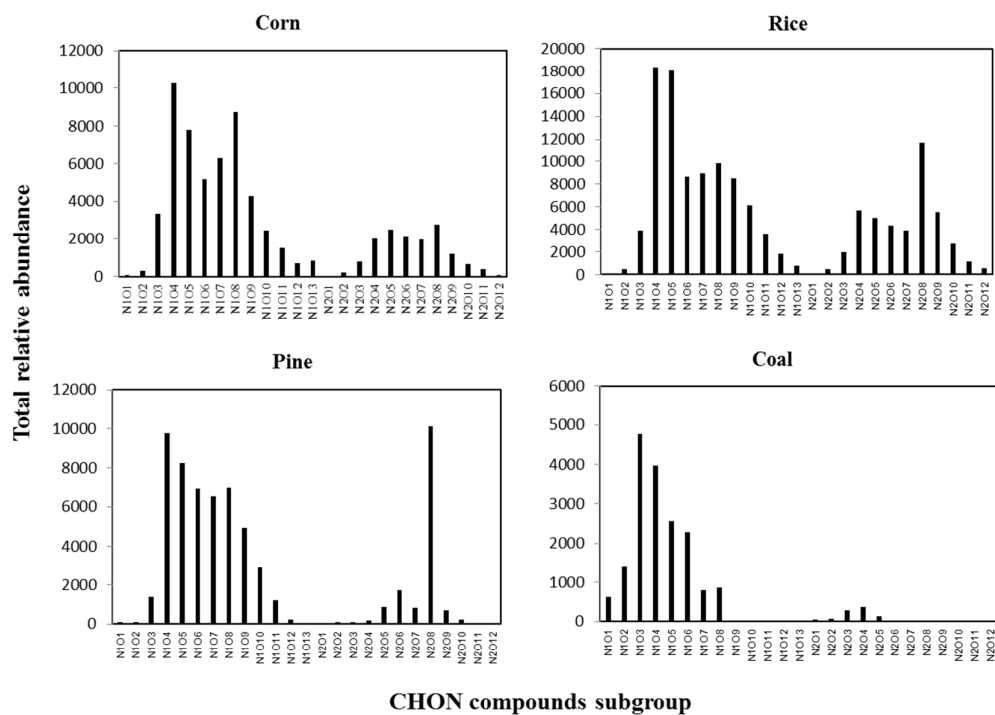

**Figure S4.** Classification of CHON compounds into different subgroups according to the number of N and O atoms in their molecules. The high of column is the sum of peak intensities in each subgroup.

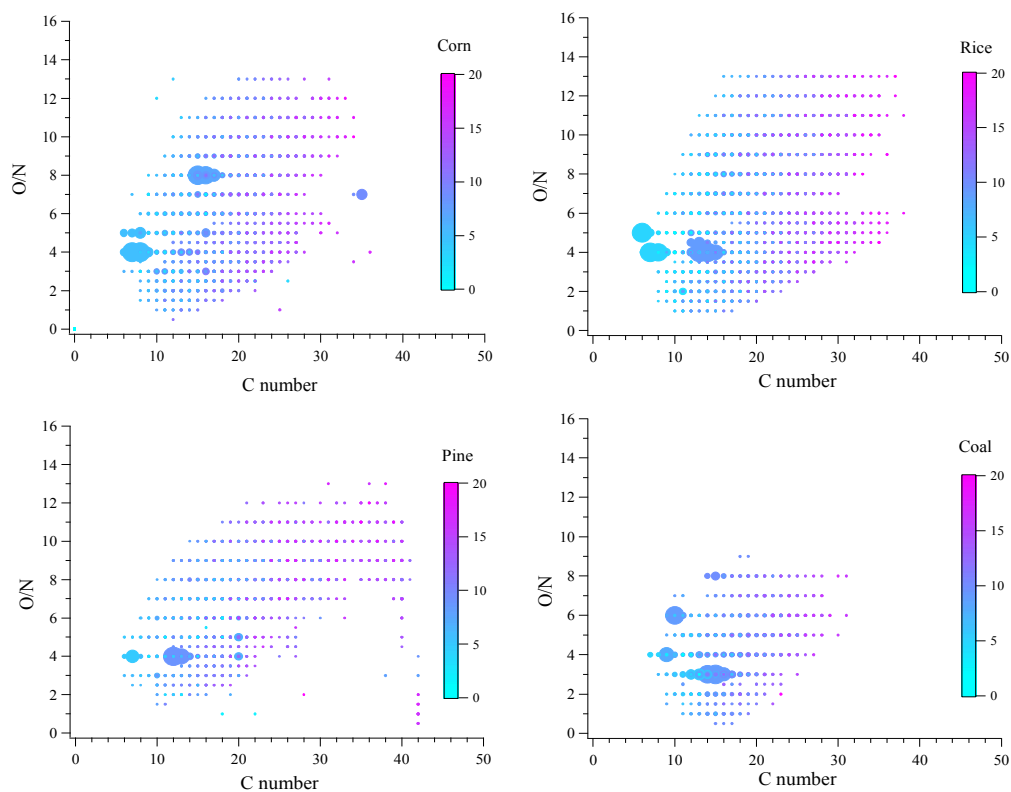

**Figure S5.** O/N vs C number for all the CHON compounds of the four smoke HULIS samples. The color bar and marker size denote the DBE values and the peak intensities of the compounds.

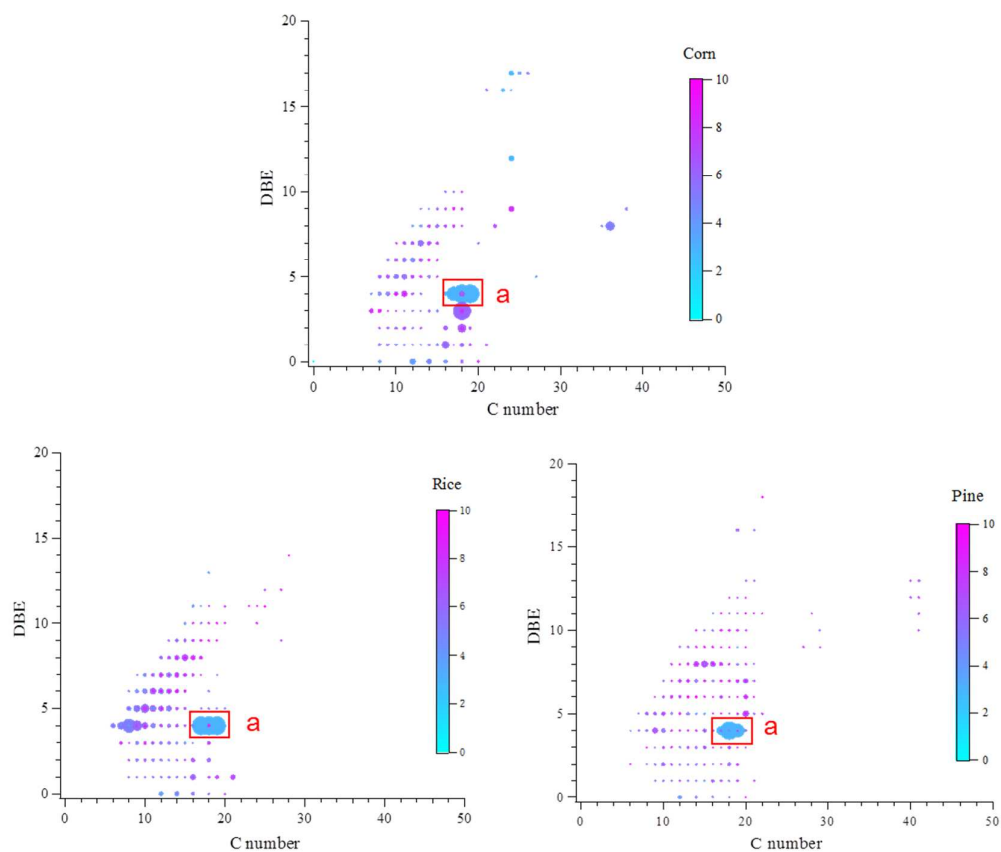

**Figure S6.** Double bond equivalent (DBE) vs C number for all the CHOS compounds of the three BB-smoke HULIS samples. The color bar and marker size denote the number of O atoms and the peak intensities of the compounds. The formulae in the box a are  $C_{17}H_{27}O_3S_1$ ,  $C_{18}H_{29}O_3S_1$ , and  $C_{19}H_{31}O_3S_1$ , corresponding to alkane sulfonates that are known to exist widely in the atmospheric environment and the background pollution during FT-ICR MS measurement.
